# Supplementary material for: Regulatory T cells confer a circadian signature on inflammatory arthritis
Source: PubMed Central journal article supplement (PMC7125185; doi:10.1038/s41467-020-15525-0), 2020-04-03
Supplement: 41467_2020_15525_MOESM1_ESM.pdf [file 41467_2020_15525_MOESM1_ESM.pdf]

Regulatory T cells confer a circadian signature to inflammatory arthritis.

Hand *et al*

Supplementary Information

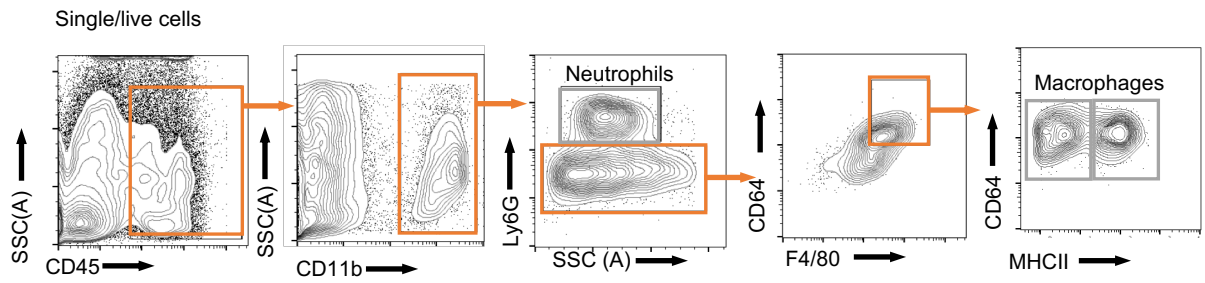

Neutrophils: CD45<sup>+</sup> CD11b<sup>+</sup> Ly6G<sup>+</sup>

Macrophages: CD45<sup>+</sup> CD11b<sup>+</sup> Ly6G<sup>-</sup> F4/80<sup>+</sup> CD64<sup>+</sup>

**Supplementary Figure 1: Gating strategy for neutrophils and macrophages from limbs.** Data corresponds to Figures 1b, c, e and f.

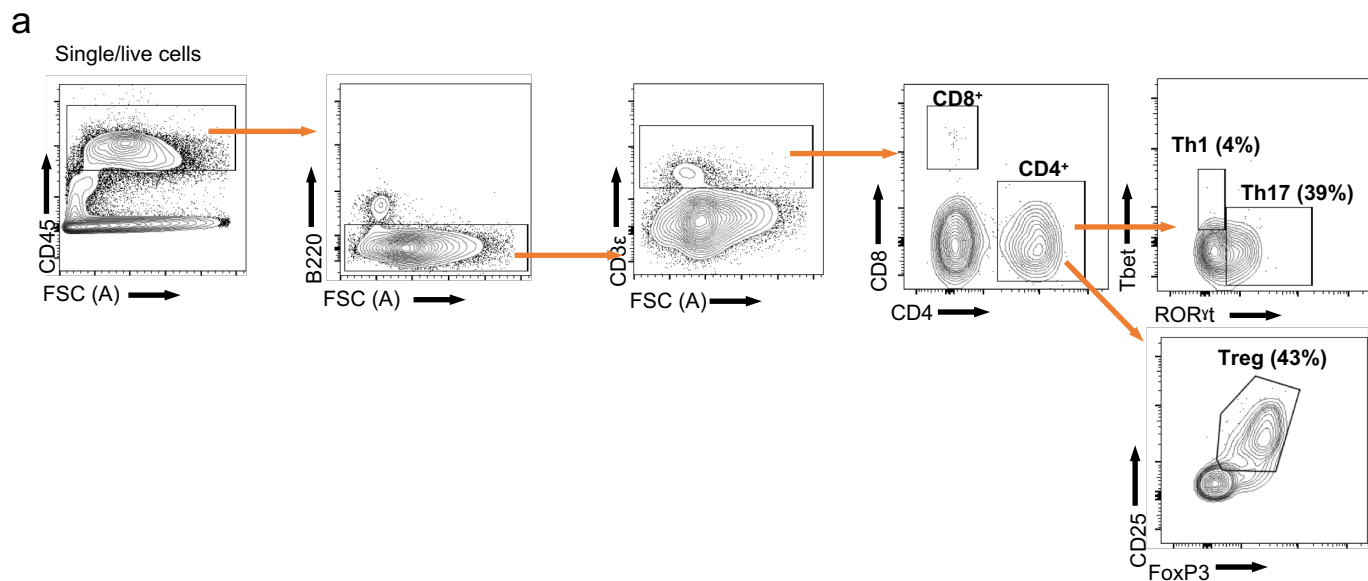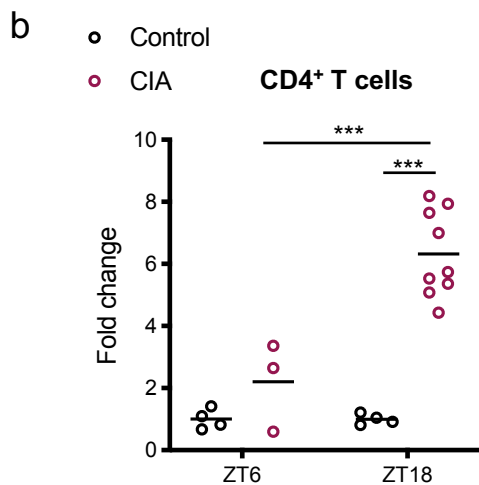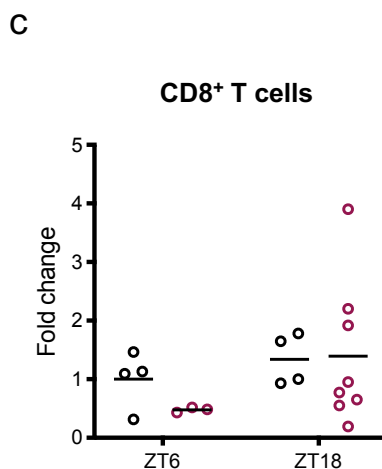

**Supplementary Figure 2: T cell subsets in limbs.** (a) Flow cytometric gating strategy for T cell subsets, CD8<sup>+</sup> and CD4<sup>+</sup> Th1, Th17 and Treg, corresponds to Figures 2a-c, 4a,b and d and Supplementary Figure 6a. (b) CD4<sup>+</sup> T cells (gating illustrated above) in limbs harvested from control and arthritic mice at ZT6 (Control n=4; CIA n=3) and ZT18 (control n=4; CIA n=9) data normalised to cell numbers in control limbs at ZT6, 2-way ANOVA and Bonferonni post hoc tests. (c) CD8<sup>+</sup> T cells (gating illustrated above) in limbs harvested from control and arthritic mice at ZT6 (control n=4; CIA n=3) and ZT18 (control n=4; CIA n=8), data normalised to cell numbers in control limbs at ZT6, 2-way ANOVA and Bonferonni post hoc tests. Graph shows individual data points and mean values. Statistical significance is shown as \*\*\*p<0.005. Source data are provided as a Source Data file.

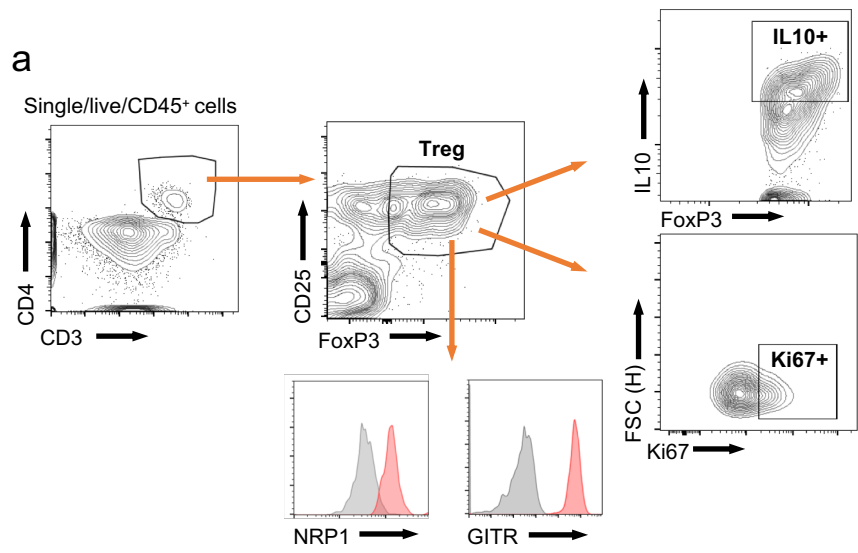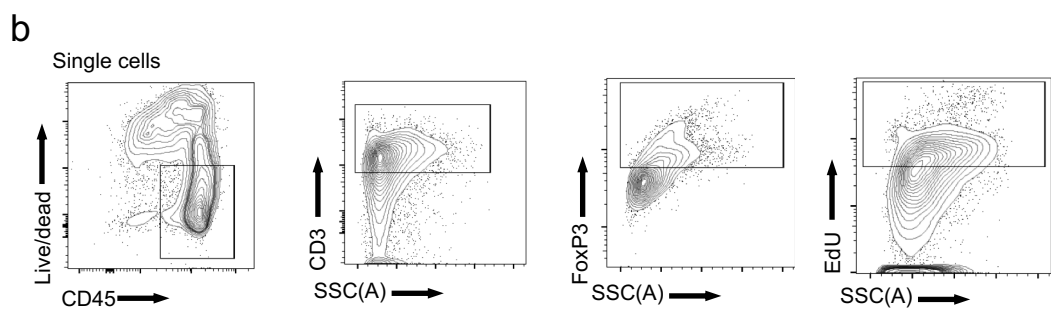

**Supplementary Figure 3: Gating strategies for Treg activation and proliferation.** (a) Flow cytometric gating strategy for Treg IL10 production and activation/proliferation markers Ki67, NRP1 and GTR. NRP1 and GTR - negative populations are shown in grey, corresponds to Figures 2c-f. (b) Flow cytometric gating strategy for EdU positive Tregs, corresponds to Figure 2d.

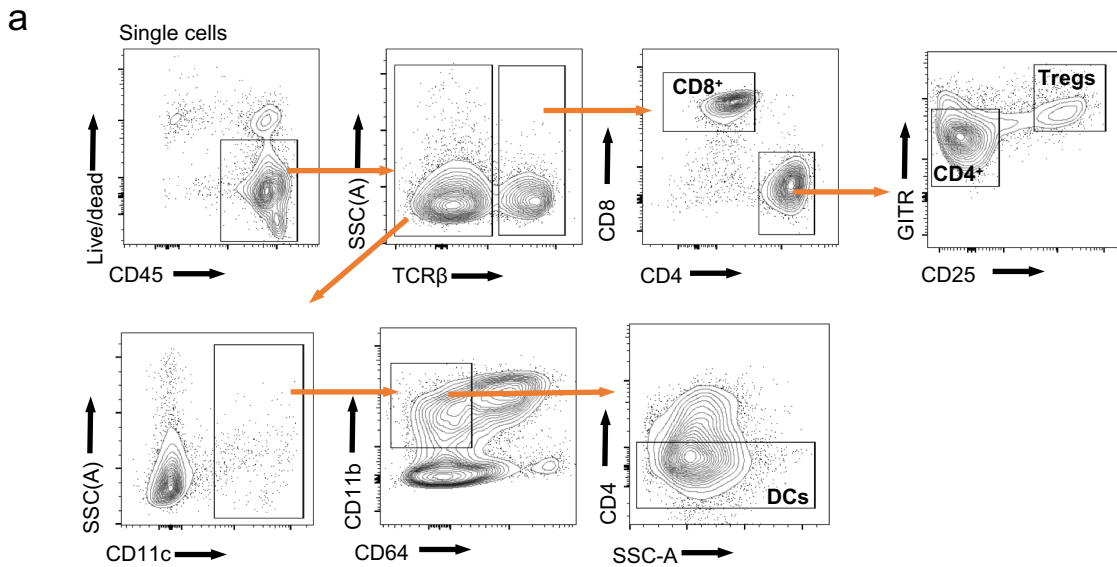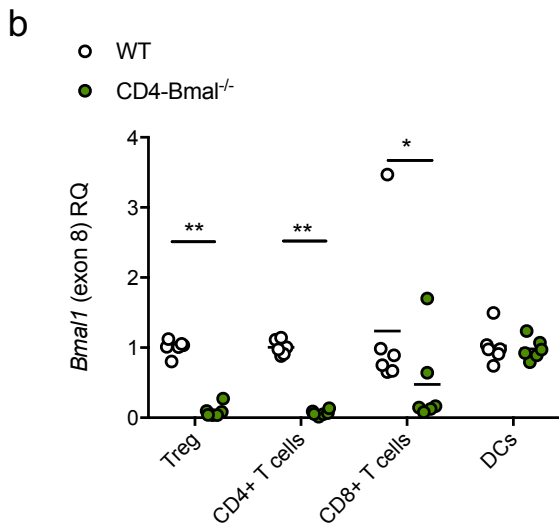

**Supplementary Figure 4: Expression of *Bmal1* (exon 8) in different cell populations.** (a) CD8<sup>+</sup> T cells (CD45<sup>+</sup>/TCR $\beta$ <sup>+</sup>/CD8<sup>+</sup>), CD4<sup>+</sup> T cells (CD45<sup>+</sup>/TCR $\beta$ <sup>+</sup>/CD4<sup>+</sup>/GITR<sup>-</sup>/CD25<sup>+</sup>), Tregs (CD45<sup>+</sup>/TCR $\beta$ <sup>+</sup>/CD4<sup>+</sup>/GITR<sup>+</sup>/CD25<sup>+</sup>) and dendritic cells (DCs: CD45<sup>+</sup>/TCR $\beta$ <sup>-</sup>/CD11c<sup>+</sup>/CD11b<sup>+</sup>/CD64<sup>+</sup>/CD4<sup>-</sup>) were sorted at ZT4 from CD4-Bmal<sup>-/-</sup> mice and wildtype counterparts. (b) Q-PCR determined expression of *Bmal1* (*exon8*) in each cell population (gating illustrated above) (normalised to *gapdh*), samples are made relative to expression in wildtypes, 2-way ANOVA and post hoc Dunnett test, n=6/genotype. Graph shows individual data points and mean values. Statistical significance is shown as \*p<0.05 and \*\*p<0.01. Source data are provided as a Source Data file.

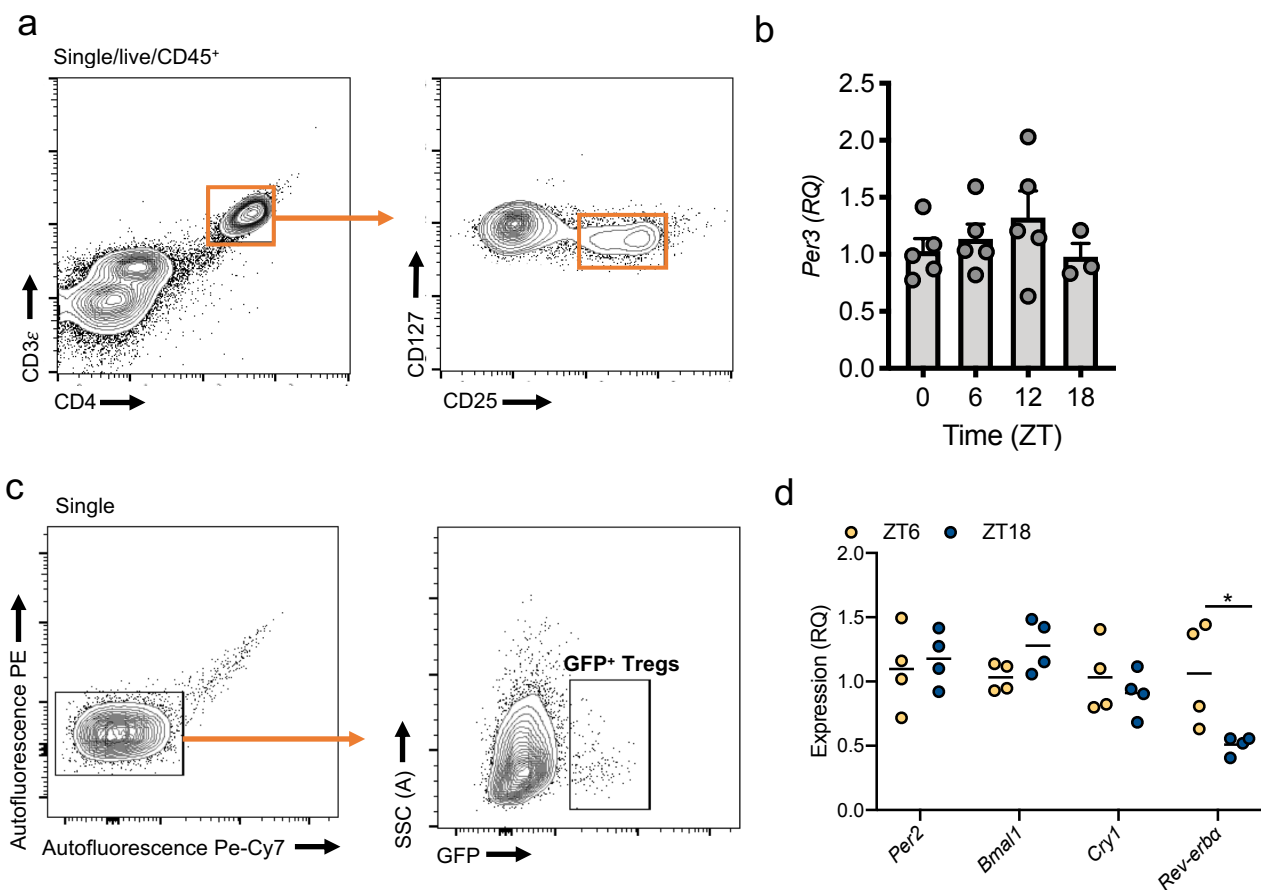

**Supplementary Figure 5: Gating strategies for sorting Tregs at different times of the day.** (a) Gating strategy for sorting Tregs from lymph nodes using extracellular markers. Single/Live/CD45<sup>+</sup>/CD3 $\epsilon$ <sup>+</sup>/CD4<sup>+</sup>/CD127<sup>+</sup>/CD25<sup>+</sup> cells were selected, corresponds to Figures 3b-c. (b) Expression of *Per3* in sorted Tregs (gating illustrated above) was quantified by QPCR (normalised to *gapdh*), normalised to ZT0 (ZT0,6,12 n=5; ZT18 n=3) One-way ANOVA and post hoc Bonferonni. Data are presented as mean values  $\pm$  SEM. (c) GFP<sup>+</sup> Tregs were sorted from lymph nodes harvested from DEREK mice at ZT6 or ZT18 with no prior antibody staining. (d) QPCR analysis for core clock genes (normalised to  $\beta$ -actin) in GFP<sup>+</sup> Tregs sorted from lymph nodes (gating illustrated above) at ZT6 and ZT18, n=4/time point, data normalised to ZT0, T tests. Graph shows individual data points and mean values. Statistical significance is shown as \*p<0.05. Data are provided as a Source Data file.

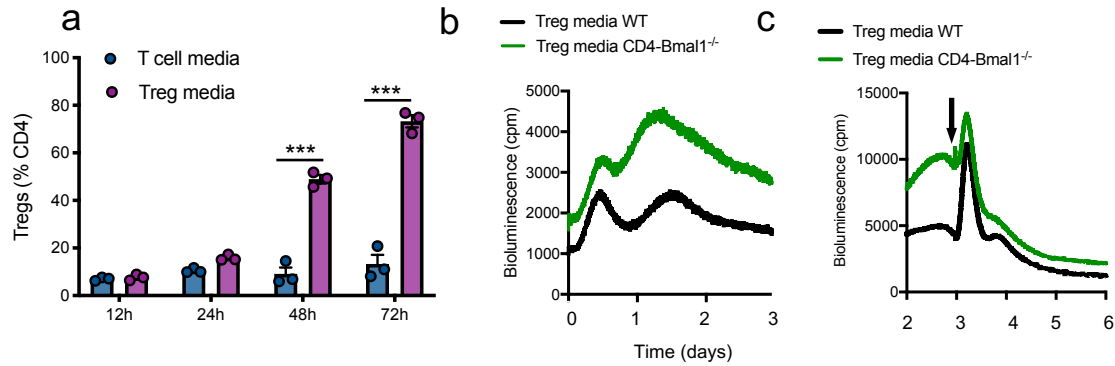

**Supplementary Figure 6: PER2 bioluminescence in Tregs from WT and CD4-Bmal1<sup>-/-</sup> mice.** (a) Culturing naïve CD4<sup>+</sup> T cells in Treg expansion media (IL2, anti-CD28, anti-CD3 $\epsilon$ , TGF $\beta$  and anti-IFN $\gamma$ ) results in significantly increased Treg numbers by Day 2, n=3/time point, 2-way ANOVA with post-hoc Bonferonni. Data are presented as mean values  $\pm$  SEM. (b) Naïve CD4<sup>+</sup> T cells from wildtype and CD4-Bmal1<sup>-/-</sup> mice on a PER2::luc background show altered bioluminescence in response to Treg expansion media. (c) After the initial response, re-stimulation with anti-CD28 and anti-CD3 $\epsilon$  provokes a second PER2::luc response. Statistical significance is shown as \*\*\*p<0.005. Source data are provided as a Source Data file.

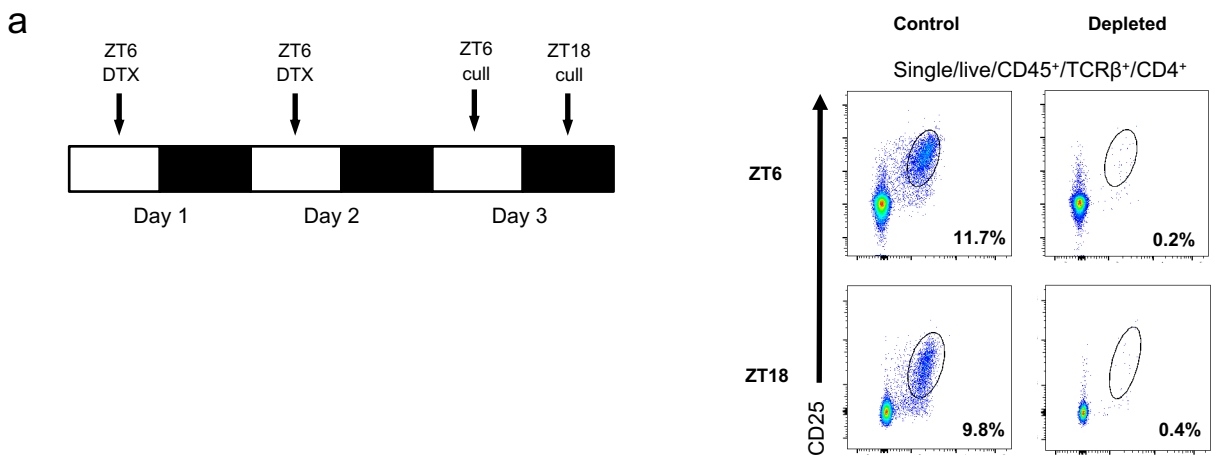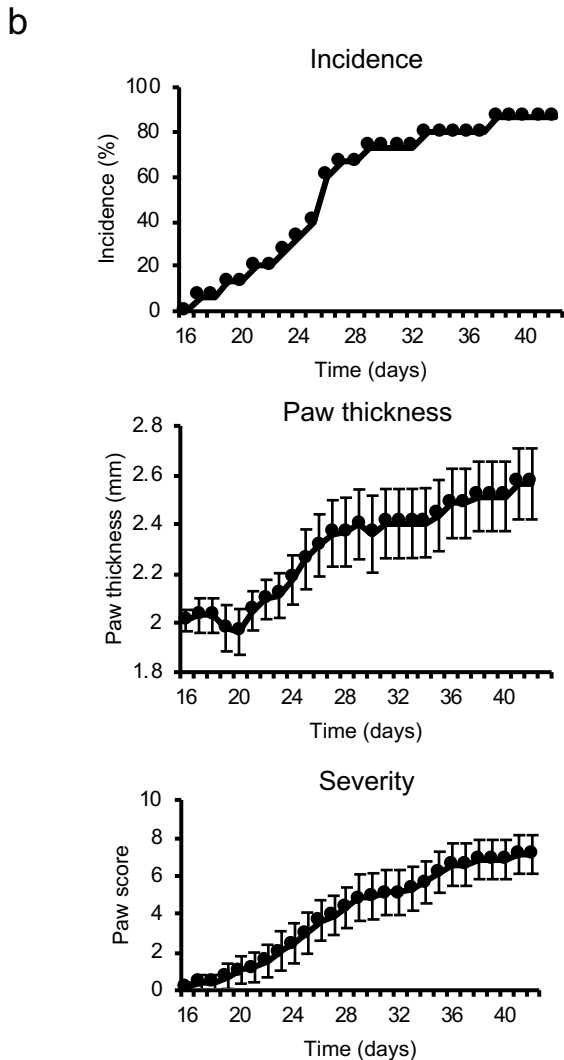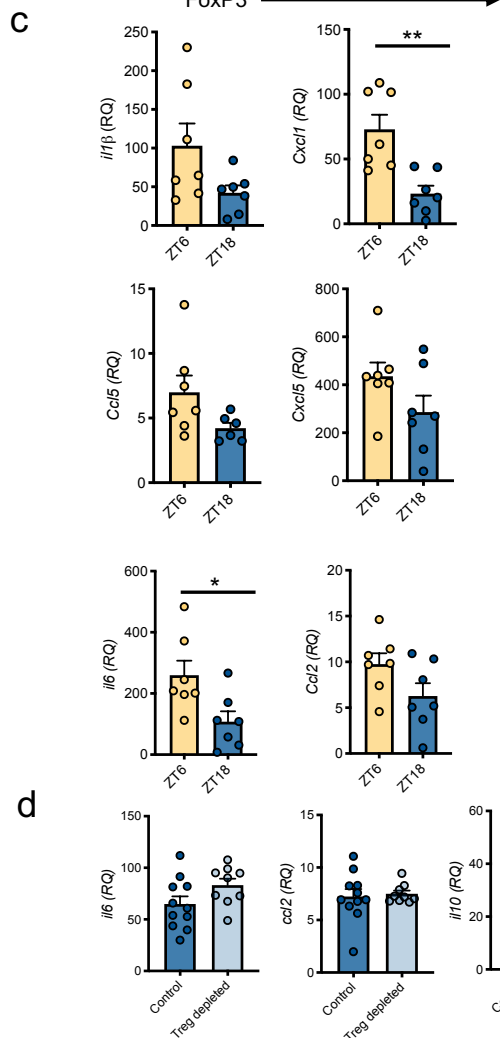

**Supplementary Figure 7: Validation of the collagen induced arthritis model in DEREG mice.** (a) Depletion of Tregs in the inguinal lymph nodes 24h (ZT6) or 36h (ZT18) after the last dose of diphtheria toxin (DTX), representative of n=3. (b) Susceptibility of DEREG mice to CIA; incidence, hind paw thickness and severity were tracked in a cohort of 15 mice from day 16 post immunization. Data are presented as mean values  $\pm$  SEM. (c) QPCR analysis of transcripts of inflammatory genes (normalised to *gapdh*) within the joints of arthritic DEREG mice (no DTX treatment) culled at ZT6 (n=7) or ZT18 (n=7). Values were normalised to expression in naïve animals at the relevant time point, T tests. (ZT6 data re-plotted from main Figure 5f). Data are presented as mean values  $\pm$  SEM. (d) QPCR analysis of transcripts of inflammatory genes (normalised to *gapdh*) within the joints of arthritic DEREG mice culled at ZT18 (control n=11; depleted n=9). Values were normalised to expression in control animals without arthritis, t tests. Data are presented as mean values  $\pm$  SEM. Statistical significance is shown as \*p<0.05 and \*\*p<0.01. Source data are provided as a Source Data file.



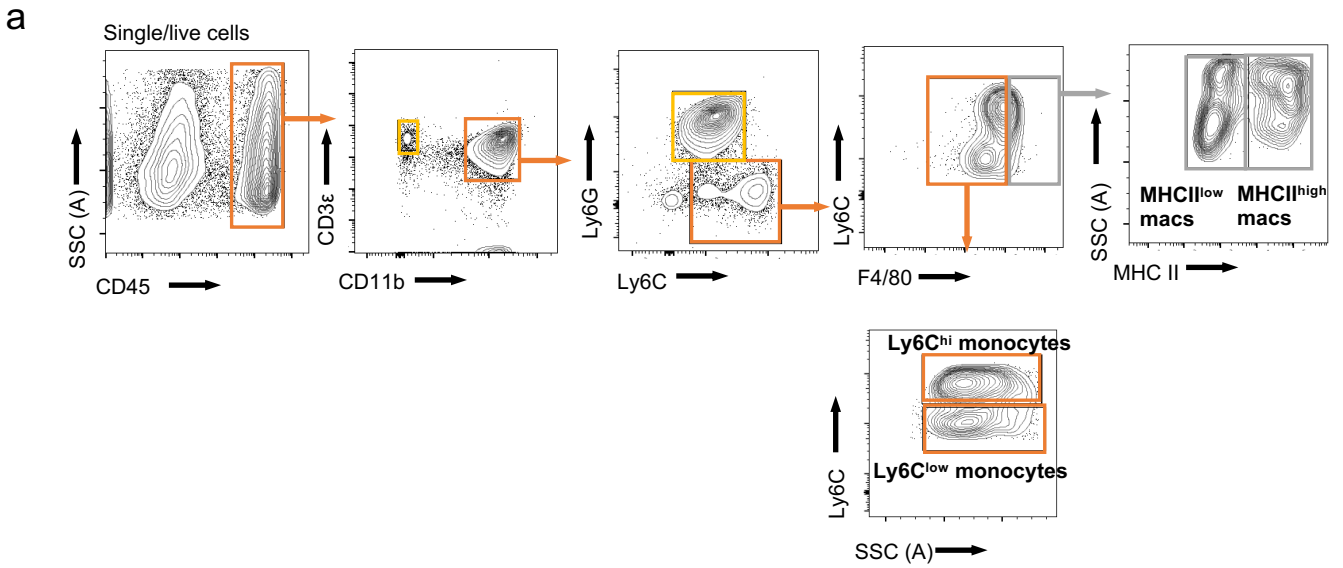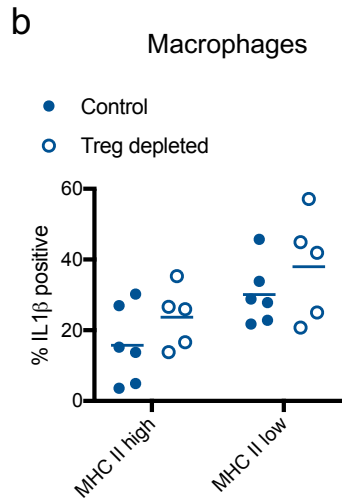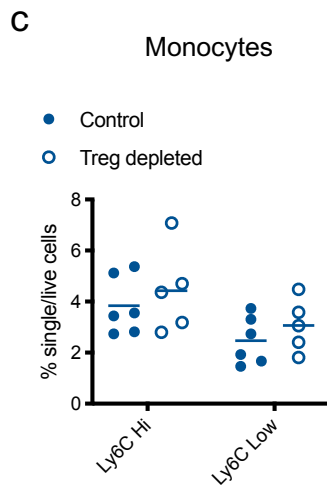

**Supplementary Figure 8: Effects of Treg depletion on monocytes and macrophages within inflamed joints.** (a) Gating strategy for monocytes and macrophages from inflamed joints, corresponds to Figure 5d and g. (b) Pro-IL1 $\beta$  expression in joint-derived macrophages (gating illustrated above) from CIA DEREK mice, control n=6, depleted n=5. (c) Numbers of different monocyte populations (gating illustrated above) in arthritic joints derived from DEREK CIA mice, control n=6, depleted n=5. Graph shows individual data points and mean values. Source data are provided as a Source Data file.

**Supplementary Table 1: Serum cytokines in arthritic DREG mice.** Serum cytokines which were significantly altered in CIA are shown. CIA control n=5, CIA Treg depleted n=6. Comparisons were made with T-tests or Mann Whitney U tests as appropriate, data expressed as mean  $\pm$  SEM, Statistical significance is shown as \*p<0.05.

| Cytokine              | CIA control (pg/ml) | CIA Treg depleted (pg/ml) | Sig.   |
|-----------------------|---------------------|---------------------------|--------|
| IL1 $\alpha$          | 19.33 $\pm$ 2.40    | 20.36 $\pm$ 1.97          |        |
| IL1 $\beta$           | 31.84 $\pm$ 2.67    | 38.48 $\pm$ 5.65          |        |
| IL2                   | 17.47 $\pm$ 4.58    | 17.28 $\pm$ 2.67          |        |
| IL3                   | 12.65 $\pm$ 0.70    | 13.75 $\pm$ 2.41          |        |
| IL6                   | 59.22 $\pm$ 16.02   | 76.07 $\pm$ 12.51         |        |
| IL10                  | 108.6 $\pm$ 11.99   | 156.9 $\pm$ 49.87         |        |
| IL12p40               | 1329 $\pm$ 171.3    | 2115 $\pm$ 188.6          | *      |
| IL12p70               | 278.6 $\pm$ 30.89   | 342 $\pm$ 71.69           |        |
| IL17                  | 173.4 $\pm$ 50.46   | 175.5 $\pm$ 55.07         |        |
| G-CSF                 | 1021 $\pm$ 155      | 1423 $\pm$ 202.8          |        |
| IFN $\gamma$          | 32.24 $\pm$ 2.85    | 39.11 $\pm$ 4.76          |        |
| CXCL1                 | 117.7 $\pm$ 14.24   | 157 $\pm$ 16.71           |        |
| CCL2 (MCP1)           | 283.4 $\pm$ 21.92   | 359.9 $\pm$ 25.03         | 0.0545 |
| CCL3 (MIP1 $\alpha$ ) | 5.51 $\pm$ 0.44     | 6.61 $\pm$ 0.54           |        |
| CCL4 (MIP1 $\beta$ )  | 38.6 $\pm$ 5.34     | 42.74 $\pm$ 4.92          |        |
| CCL5 (Rantes)         | 264.7 $\pm$ 53.43   | 329 $\pm$ 34.4            |        |
| TNF $\alpha$          | 129 $\pm$ 15.9      | 152.7 $\pm$ 28.8          |        |

**Supplementary Table 2: Flow cytometry antibodies.**

| Antibody | Clone     | Colours (supplier)                                                                                                 | Antibody      | Clone       | Colours (supplier)                                                             |
|----------|-----------|--------------------------------------------------------------------------------------------------------------------|---------------|-------------|--------------------------------------------------------------------------------|
| B220     | RA3-6B2   | APC-Cy7 (Invitrogen)                                                                                               | FoxP3         | FJK-16s     | BV421 (Invitrogen)<br>FITC (Invitrogen)                                        |
| CD3ε     | 145-2C11  | PerCP-Cy5.5 (eBioscience)<br>BV711 (Biolegend)<br>PE-Cy7 (Biolegend)<br>PE (Biolegend)<br>Unconjugated (Biolegend) | GITR          | DTA-1       | APC (Biolegend)                                                                |
| CD4      | RM4-5     | PE-Texas red (Invitrogen)<br>AF700 (Biolegend)<br>PE (Biolegend)<br>BV711 (Biolegend)                              | IFNγ          | XMG1.2      | Unconjugated (Biolegend)                                                       |
| CD8a     | 53-6.7    | Pe-Cy7 (Biolegend)<br>BV785 (Biolegend)                                                                            | Ki67          | SolA15      | PE (Invitrogen)                                                                |
| CD11b    | M1/70     | BV605 (Biolegend)<br>PE (Biolegend)<br>PerCP-Cy5.5 (eBioscience)<br>PeCy7 (Biolegend)                              | Ly6C          | AL-21       | AF700 (BD Bioscience)<br>PerCP-Cy5.5 (BD Bioscience)<br>PE-Cy7 (BD Bioscience) |
| CD11c    | N418      | BV421 (Biolegend)                                                                                                  | Ly6G          | 1A8         | APC-Cy7 (Biolegend)                                                            |
| CD25     | PC61.5    | AF488 (Invitrogen)<br>PE-Cy7 (Invitrogen)                                                                          | MHC II        | M5/114.15.2 | FITC (Biolegend)<br>BV650 (BD Bioscience)                                      |
| CD28     | 37.51     | Unconjugated (Biolegend)                                                                                           | NRP1          | 761705      | FITC (R&D Systems)                                                             |
| CD45     | 30-F11    | BV650 (Biolegend)<br>AF700 (BD Biosciences)<br>BV510 (Biolegend)                                                   | RORγ(t)       | B2D         | PE (eBioscience)                                                               |
| CD64     | X54-5/7.1 | FITC (Biolegend)<br>PE (Biolegend)                                                                                 | TBET          | 4B10        | APC (Invitrogen)                                                               |
| CD127    | A7R34     | PE (Biolegend)                                                                                                     | TCRβ          | H57-597     | BV711 (Biolegend)                                                              |
| CD90.2   | 30-H12    | BV786 (Biolegend)                                                                                                  | IL1β pro-form | REA577      | Pe-Cy7 (Miltenyi Biotec)                                                       |
| CXCR4    | L276F12   | PE (Biolegend)<br>Biotin (Biolegend)                                                                               | IL10          | JES5-16E3   | BV605 (BD Biosciences)                                                         |
| F4/80    | BM8       | BV786 (Biolegend)<br>APC (eBioscience)                                                                             |               |             |                                                                                |

**Supplementary Table 3: Primer and probe sequences for QPCR analysis.** Genes marked with an \* were assayed using commercial primer probe sets purchased from ThermoFisher Scientific (product code provided).

| Gene             | Forward                  | Reverse                     | Probe (Fam-Tamra)                   |
|------------------|--------------------------|-----------------------------|-------------------------------------|
| <i>β-actin</i>   | AGGTCATCACTATTGGCAACGA   | CACTTCATGATGGAATTGAATGTAGTT | TGCCACAGGATTCCATACCCAAGAAGG         |
| <i>Bmal1</i>     | CGTCGGGACAAAATGAACAG     | GAACAGCCATCCTTAGCAC         | TACCAACATGCAATGCAATGTCCAGGA<br>A    |
| <i>Ccl2</i>      | CTTCTGGGCCTGCTGTTCA      | CCAGCCTACTCATTGGGATCA       | CTCAGCCAGATGCAGTTAACGCCCC           |
| <i>Ccl5</i>      | Mm01302427_m1            |                             |                                     |
| <i>Cry1</i>      | CTGGCGTGGAAGTCATCGT      | CTGTCCGCCATTGAGTTCTATG      | CGCATTTCACATACACTGTATGACCTG<br>GACA |
| <i>Cxcl1</i>     | CTGCACCCAAACCGAAGTC      | AGCTTCAGGGTCAAGGCAAG        | CACTCAAGAATGGTCGCGAGGC              |
| <i>Cxcl5*</i>    | Mm00436451_g1            |                             |                                     |
| <i>Gapdh</i>     | CAATGTGTCCGTCGTCGATCT    | GTCCTCAGTGTAGCCCAAGATG      | CGTGCCGCCTGGAGAAACCTGCC             |
| <i>Ilβ</i>       | TCGCTCAGGGTCACAAAGAAA    | CCATCAGAGGCAAGGAGGAA        | CATGGCACATTCTGTTCAAAGAGAGCC<br>TG   |
| <i>Il6</i>       | CTATACCACTTCACAAGTCGGAGG | TGCACAACCTCTTTTCTCATTTC     | TTAATTACACATGTTCTCTGGGAAATCG        |
| <i>Il10*</i>     | Mm01288386_m1            |                             |                                     |
| <i>Per2</i>      | GCCTTCAGAACTCATGATGACAGA | TTTGTGTGCGTCAGCTTTGG        | ACTGCTCACTACTGCAGCCGCTCGT           |
| <i>Per3</i>      | Mm00478120_m1            |                             |                                     |
| <i>Rev-erba*</i> | Mm00520708_m1            |                             |                                     |

**Supplementary Table 4: 2-way ANOVAs - P values for interaction and main effects.**

| Figure | Description                |                  | Interaction    | Time of day effect | Disease effect   |
|--------|----------------------------|------------------|----------------|--------------------|------------------|
| 1b     | MHC II <sup>low</sup> mac  |                  | NS             | NS                 | *** (P<0.0001)   |
|        | MHC II <sup>high</sup> mac |                  | NS             | NS                 | *** (P<0.0001)   |
| 1c     | MHC II <sup>low</sup> mac  | <i>Per2</i>      | *** (P=0.0006) | *** (P<0.0001)     | *** (P=0.0001)   |
|        |                            | <i>Cry1</i>      | ** (P=0.0018)  | *** (P<0.0001)     | * (P=0.0159)     |
|        |                            | <i>Bmal1</i>     | * (P=0.0204)   | NS                 | *** (P=0.0001)   |
|        |                            | <i>Rev-erb α</i> | *** (P<0.0001) | *** (P<0.0001)     | *** (P<0.0001)   |
|        | MHC II <sup>high</sup> mac | <i>Per2</i>      | ** (P=0.0040)  | *** (P=0.0005)     | *** (P<0.0001)   |
|        |                            | <i>Cry1</i>      | * (P=0.0254)   | *** (P=0.0002)     | * (P=0.0216)     |
|        |                            | <i>Bmal1</i>     | *** (P=0.0002) | ** (P=0.0052)      | *** (P<0.0001)   |
|        |                            | <i>Rev-erb α</i> | *** (P<0.0001) | *** (P<0.0001)     | *** (P<0.0001)   |
| 1e     | Neutrophils                |                  | NS             | NS                 | *** (P<0.0001)   |
| 1f     | Neutrophils                | <i>Per2</i>      | NS             | * (P=0.0390)       | NS               |
|        |                            | <i>Cry1</i>      | NS             | ** (P=0.0094)      | NS               |
|        |                            | <i>Bmal1</i>     | NS             | NS                 | ** (P=0.0081)    |
|        |                            | <i>Rev-erb α</i> | *** (P<0.0001) | *** (P<0.0001)     | *** (P<0.0001)   |
| 2a     | CD3ε                       |                  | *** (P=0.0004) | *** (P=0.0002)     | *** (P<0.0001)   |
| 2b     | T <sub>h</sub> 1           |                  | NS             | NS                 | * (P=0.0161)     |
|        | T <sub>h</sub> 17          |                  | NS             | NS                 | *** (P<0.0001)   |
| 2c     | Treg                       |                  | *** (P<0.0001) | *** (P<0.0001)     | *** (P<0.0001)   |
| 2d     | Ki67                       |                  | NS             | *** (P<0.0007)     | NS               |
| 2e     | NRP1                       |                  | * (P=0.0285)   | NS                 | NS               |
|        | GITR                       |                  | NS             | NS                 | ** (P=0.0077)    |
| Figure | Description                |                  | Interaction    | Time of day effect | Genotype effect  |
| 3b     | Treg                       | <i>Per2</i>      | NS             | NS                 | NS               |
|        |                            | <i>Bmal1</i>     | NS             | NS                 | *** (P<0.0001)   |
|        |                            | <i>Cry1</i>      | NS             | NS                 | *** (P<0.0001)   |
|        |                            | <i>Rev-erb α</i> | * (P=0.0166)   | ** (P=0.0014)      | *** (P<0.0001)   |
| 4b     | Treg CXCR4                 | ILN              | NS             | *** (P<0.0001)     | NS               |
|        |                            | Spleen           | NS             | *** (P<0.0001)     | NS               |
| Figure | Description                |                  | Interaction    | Time of day effect | Disease effect   |
| 4e     | Corticosterone             |                  | ** (P=0.0058)  | *** (P<0.0001)     | NS               |
| Figure | Description                |                  | Interaction    | Depletion effect   | Cell type effect |
| 5g     | IL1β                       |                  | NS             | * (P=0.0117)       | *** (P<0.0001)   |
| Figure | Description                |                  | Interaction    | Time of day effect | Disease effect   |
| S2b    | CD4+ T cells               |                  | ** (P=0.0015)  | ** (P=0.0016)      | *** (P<0.0001)   |
| S2c    | CD8+ T cells               |                  | NS             | NS                 | NS               |
| Figure | Description                |                  | Interaction    | Depletion effect   | Cell type effect |
| S8b    | Macrophage                 | IL1β             | NS             | NS                 | ** (P=0.0071)    |
|        | Monocytes                  | number           | NS             | NS                 | * (P=0.0169)     |
