# Supplementary material for: Regulatory T cells confer a circadian signature on inflammatory arthritis
Source: PubMed Central journal article supplement (PMC7125185; doi:10.1038/s41467-020-15525-0), 2020-04-03
Supplement: 41467_2020_15525_MOESM3_ESM.pdf [file 41467_2020_15525_MOESM3_ESM.pdf]

## Reporting Summary

Nature Research wishes to improve the reproducibility of the work that we publish. This form provides structure for consistency and transparency in reporting. For further information on Nature Research policies, see [Authors & Referees](#) and the [Editorial Policy Checklist](#).

### Statistics

For all statistical analyses, confirm that the following items are present in the figure legend, table legend, main text, or Methods section.

n/a Confirmed

- The exact sample size ( $n$ ) for each experimental group/condition, given as a discrete number and unit of measurement
- A statement on whether measurements were taken from distinct samples or whether the same sample was measured repeatedly
- The statistical test(s) used AND whether they are one- or two-sided  
*Only common tests should be described solely by name; describe more complex techniques in the Methods section.*
- A description of all covariates tested
- A description of any assumptions or corrections, such as tests of normality and adjustment for multiple comparisons
- A full description of the statistical parameters including central tendency (e.g. means) or other basic estimates (e.g. regression coefficient) AND variation (e.g. standard deviation) or associated estimates of uncertainty (e.g. confidence intervals)
- For null hypothesis testing, the test statistic (e.g.  $F$ ,  $t$ ,  $r$ ) with confidence intervals, effect sizes, degrees of freedom and  $P$  value noted  
*Give  $P$  values as exact values whenever suitable.*
- For Bayesian analysis, information on the choice of priors and Markov chain Monte Carlo settings
- For hierarchical and complex designs, identification of the appropriate level for tests and full reporting of outcomes
- Estimates of effect sizes (e.g. Cohen's  $d$ , Pearson's  $r$ ), indicating how they were calculated

*Our web collection on [statistics for biologists](#) contains articles on many of the points above.*

### Software and code

Policy information about [availability of computer code](#)

Data collection

StepOne software v2.1  
BioRad microplate manager v2.1  
Bioplex Manager 6.2  
FACS DIVA v8.0.1

Data analysis

GraphPad Prism Versions 7.0a and 8.3.1  
Flow Jo Version 10.5.3  
Biodare2 (biodare2.ed.ac.uk)

For manuscripts utilizing custom algorithms or software that are central to the research but not yet described in published literature, software must be made available to editors/reviewers. We strongly encourage code deposition in a community repository (e.g. GitHub). See the Nature Research [guidelines for submitting code & software](#) for further information.

### Data

Policy information about [availability of data](#)

All manuscripts must include a [data availability statement](#). This statement should provide the following information, where applicable:

- Accession codes, unique identifiers, or web links for publicly available datasets
- A list of figures that have associated raw data
- A description of any restrictions on data availability

The authors declare that the data supporting the findings of this study presented in Figures 1-5 and Supplementary Figures 1-8 are available within the paper and its supplementary information. Data from photonmultiplier and bioplex experiments are available from the corresponding author upon reasonable request.

## Field-specific reporting

Please select the one below that is the best fit for your research. If you are not sure, read the appropriate sections before making your selection.

- Life sciences       Behavioural & social sciences       Ecological, evolutionary & environmental sciences

For a reference copy of the document with all sections, see [nature.com/documents/nr-reporting-summary-flat.pdf](https://www.nature.com/documents/nr-reporting-summary-flat.pdf)

## Life sciences study design

All studies must disclose on these points even when the disclosure is negative.

|                 |                                                                                                                                                                                                                                                                                                                                                                                                                                                                                                                                                                                                                                                                                                                                                                                                                                                                                                                                                                                                                                                                                                                     |
|-----------------|---------------------------------------------------------------------------------------------------------------------------------------------------------------------------------------------------------------------------------------------------------------------------------------------------------------------------------------------------------------------------------------------------------------------------------------------------------------------------------------------------------------------------------------------------------------------------------------------------------------------------------------------------------------------------------------------------------------------------------------------------------------------------------------------------------------------------------------------------------------------------------------------------------------------------------------------------------------------------------------------------------------------------------------------------------------------------------------------------------------------|
| Sample size     | Experiments were designed to ensure the minimum number of animals were used in order to obtain biologically significant results. Determination of experimental and control group sizes were based on previous experience with the models and power analyses of previous results. Animal numbers were based on coefficient variance measures determined in control groups of previous studies. N number calculations were based on achieving 80% power, with 5% type 1 error.<br>Previous studies used for these calculations include:<br>Hand et al. (2019) The circadian regulator Bmal1 in joint mesenchymal cells regulates both joint development and inflammatory arthritis. <i>Arthritis Res Ther</i> 21:5<br>Pariollaud et al (2018) Circadian clock component REV-ERB alpha controls homeostatic regulation of pulmonary inflammation. <i>J Clin Invest</i> 128:2281<br>Hand et al (2016) The circadian clock regulates inflammatory arthritis. <i>FASEB J</i> 30:3759<br>Gibbs et al (2014) An epithelial circadian clock controls pulmonary inflammation and glucocorticoid action. <i>Nat Med</i> 20:919 |
| Data exclusions | For QPCR data analysis, in order to exclude any erroneous data points generated by experimental error, outliers which deviated markedly from other observations in the group were discovered using the ROUT method in Prism (a method to detect outliers while fitting a curve with a non-linear regression) and were excluded from further analysis.                                                                                                                                                                                                                                                                                                                                                                                                                                                                                                                                                                                                                                                                                                                                                               |
| Replication     | All in vitro studies were successfully repeated on three separate occasions. In vivo experiments were successfully replicated in at least two independent experiments performed under identical conditions.                                                                                                                                                                                                                                                                                                                                                                                                                                                                                                                                                                                                                                                                                                                                                                                                                                                                                                         |
| Randomization   | Animals were randomly assigned into experimental groups (e.g. time points for tissue harvest). For the T cell ex vivo studies, wells of cells were allocated randomly to treatment groups (e.g. T cell media or Treg media) and to treatment times.                                                                                                                                                                                                                                                                                                                                                                                                                                                                                                                                                                                                                                                                                                                                                                                                                                                                 |
| Blinding        | Wherever possible investigators were blinded to group allocation during sample collection and analysis. It was not possible to blind investigators to group allocation during tissue collection when experimental groups were defined by time-of-day. However investigators were blind to genotype where applicable. Additionally, for safety reasons it was not possible to blind investigators to treatment group when diphtheria toxin was administered to DEREK mice. Sample analysis was performed with the investigator blind to genotype, time of day and treatment of samples.                                                                                                                                                                                                                                                                                                                                                                                                                                                                                                                              |

## Reporting for specific materials, systems and methods

We require information from authors about some types of materials, experimental systems and methods used in many studies. Here, indicate whether each material, system or method listed is relevant to your study. If you are not sure if a list item applies to your research, read the appropriate section before selecting a response.

### Materials & experimental systems

| n/a                                 | Involvement                                                     |
|-------------------------------------|-----------------------------------------------------------------|
| <input type="checkbox"/>            | <input checked="" type="checkbox"/> Antibodies                  |
| <input checked="" type="checkbox"/> | <input type="checkbox"/> Eukaryotic cell lines                  |
| <input checked="" type="checkbox"/> | <input type="checkbox"/> Palaeontology                          |
| <input type="checkbox"/>            | <input checked="" type="checkbox"/> Animals and other organisms |
| <input checked="" type="checkbox"/> | <input type="checkbox"/> Human research participants            |
| <input checked="" type="checkbox"/> | <input type="checkbox"/> Clinical data                          |

### Methods

| n/a                                 | Involvement                                        |
|-------------------------------------|----------------------------------------------------|
| <input checked="" type="checkbox"/> | <input type="checkbox"/> ChIP-seq                  |
| <input type="checkbox"/>            | <input checked="" type="checkbox"/> Flow cytometry |
| <input checked="" type="checkbox"/> | <input type="checkbox"/> MRI-based neuroimaging    |

## Antibodies

Antibodies used

Antibody/ Colour/ supplier/ Catalogue number/ Clone/ Dilution  
 B220/ APC-Cy7/ Invitrogen/ A15399/ RA3-6B2/ 1:200  
 CD3e/unconjugated/Biolegend/100314/145-2C11/1:333  
 CD3e/ PerCP-Cy5.5/ eBioscience/ 45-0031-82/ 145-2C11/ 1:200  
 CD3e/ BV711/ Biolegend/ 100349/ 145-2C11/ 1:200  
 CD3e/ PE-Cy7/ Biolegend/ 100320/ 145-2C11/ 1:200

CD3ε/ PE/ Biolegend/ 100308/ 145-2C11/ 1:200  
 CD4/ PE-Texas red/ Invitrogen/ MCD0417/ RM4-5/ 1:200  
 CD4/ AF700/ Biolegend/ 100536/ RM4-5/ 1:200  
 CD4/ PE/ Biolegend/ 100512/ RM4-5/ 1:200  
 CD4/ BV711/ Biolegend/ 100550/ RM4-5/ 1:200  
 CD8a/ Pe-Cy7/ Biolegend/ 100722/ 53-6.7/ 1:200  
 CD8a/ BV785/ Biolegend/ 100750/ 53-6.7/ 1:200  
 CD11b/ BV605/ Biolegend/ 101257/ M1/70/ 1:200  
 CD11b/ PE/ Biolegend/ 101208/ M1/70/ 1:200  
 CD11b/ PerCP-Cy5.5/ eBioscience/ 45-0112-82/ M1/70/ 1:200  
 CD11b/ PeCy7/ Biolegend/ 101216/ M1/70/ 1:200  
 CD11c/ BV421/ Biolegend/ 117330/ N418/ 1:200  
 CD25/ AF488/ Invitrogen/ 53-0251-82/ PC61.5/ 1:200  
 CD25/ PE-Cy7/ Invitrogen/ 25-0251-82/ PC61.5/ 1:200  
 CD28/unconjugated/Biolegend/102112/37.51/1:1000  
 CD45/ BV650/ Biolegend/ 103151/ 30-F11/ 1:200  
 CD45/ AF700/ BD Biosciences/ 56-0451-82/ 30-F11/ 1:200  
 CD45/ BV510/ Biolegend/ 103137/ 30-F11/ 1:200  
 CD64/ FITC/ Biolegend/ 139316/ X54-5/7.1/ 1:200  
 CD64/ PE/ Biolegend/ 139304/ X54-5/7.1/ 1:200  
 CD127/ PE/ Biolegend/ 135010/ A7R34/ 1:200  
 CD90.2/ BV786/ Biolegend/ 105331/ 30-H12/ 1:200  
 CXCR4/ PE/ Biolegend/ 146506/ L276F12/ 1:200  
 CXCR4/ Biotin/ Biolegend/ 146516/ L276F12/ 1:100  
 F4/80/ BV786/ Biolegend/ 123141/ BM8/ 1:200  
 F4/80/ APC/ eBioscience/ 17-4801-82/ BM8/ 1:200  
 FoxP3/ BV421/ Invitrogen/ 48-5773-82/ FJK-16s/ 1:100  
 FoxP3/ FITC/ Invitrogen/ 11-5773-82/ FJK-16s/ 1:100  
 GITR/ APC/ Biolegend/ 126312/ DTA-1/ 1:200  
 IFNγ/unconjugated/BioLegend/505834/XMG1.2/1:100  
 Ki67/ PE/ Invitrogen/ 12-5698-82/ SolA15/ 1:100  
 Ly6C/ AF700/ BD Bioscience/ 561237/ AL-21/ 1:200  
 Ly6C/ PerCP-Cy5.5/ BD Bioscience/ 560525/ AL-21/ 1:200  
 Ly6C/ PE-Cy7/ BD Bioscience/ 560593/ AL-21/ 1:200  
 Ly6G/ APC-Cy7/ Biolegend/ 127624/ 1A8/ 1:200  
 MHC II / FITC/ Biolegend/ 107606/ M5/114.15.2/ 1:200  
 MHC II/ BV650 / BD Bioscience/ 563415/ M5/114.15.2/ 1:200  
 NRP1/ FITC/ R&D Systems/ FAB5994G/ 761705/ 1:200  
 RORγt/ PE/ eBioscience/ 12-6981-82/ B2D/ 1:100  
 TBET/ APC/ Invitrogen/ 17-5825-82/ 4B10/ 1:100  
 TCRβ/ BV711/ Biolegend/ 109243/ H57-597/ 1:200  
 IL1β pro-form/ Pe-Cy7/ Miltenyi Biotec/ 130-109-043/ REA577/ 1:10  
 IL10/ BV605/ BD Biosciences/ 564082/ JES5-16E3/ 1:100

## Validation

## Antibody/ Colour/ Supplier/ Validation

B220/ APC-Cy7 / Invitrogen/ <https://www.thermofisher.com/antibody/product/CD45R-Antibody-clone-RA3-6B2-Monoclonal/A15399>  
 CD3ε/unconjugated/Biolegend/<https://www.biolegend.com/en-us/products/purified-anti-mouse-cd3epsilon-antibody-28>  
 CD3ε/ PerCP-Cy5.5 / eBioscience/ <https://www.thermofisher.com/antibody/product/CD3ε-Antibody-clone-145-2C11-Monoclonal/45-0031-82>  
 CD3ε/ BV711 / Biolegend/ <https://www.biolegend.com/en-us/products/brilliant-violet-711-anti-mouse-cd3epsilon-antibody-11975>  
 CD3ε/ PE-Cy7 / Biolegend/ <https://www.biolegend.com/en-us/products/pe-cy7-anti-mouse-cd3epsilon-antibody-1899>  
 CD3ε/ PE / Biolegend/ <https://www.biolegend.com/en-us/products/pe-anti-mouse-cd3epsilon-antibody-25>  
 CD4/ PE-Texas red / Invitrogen/ <https://www.thermofisher.com/antibody/product/CD4-Antibody-clone-RM4-5-Monoclonal/MCD0417>  
 CD4/ AF700 / Biolegend/ <https://www.biolegend.com/en-us/products/alexa-fluor-700-anti-mouse-cd4-antibody-3386>  
 CD4/ PE / Biolegend/ <https://www.biolegend.com/en-us/products/pe-anti-mouse-cd4-antibody-482>  
 CD4/ BV711 / Biolegend/ <https://www.biolegend.com/en-us/products/brilliant-violet-711-anti-mouse-cd4-antibody-7925>  
 CD8a/ Pe-Cy7 / Biolegend/ <https://www.biolegend.com/en-us/products/pe-cy7-anti-mouse-cd8a-antibody-1906>  
 CD8a/ BV785 / Biolegend/ <https://www.biolegend.com/en-us/products/brilliant-violet-785-anti-mouse-cd8a-antibody-7957>  
 CD11b/ BV605 / Biolegend/ <https://www.biolegend.com/en-us/products/brilliant-violet-605-anti-mouse-human-cd11b-antibody-7637>  
 CD11b/ PE / Biolegend/ <https://www.biolegend.com/en-us/products/pe-anti-mouse-human-cd11b-antibody-349>  
 CD11b/ PerCP-Cy5.5 / eBioscience/ <https://www.thermofisher.com/antibody/product/CD11b-Antibody-clone-M1-70-Monoclonal/45-0112-82>

CD11b/ PeCy7 / Biolegend/ <https://www.biolegend.com/en-us/products/pe-cy7-anti-mouse-human-cd11b-antibody-1921>  
 CD11c/ BV421 / Biolegend/ <https://www.biolegend.com/en-us/products/brilliant-violet-421-anti-mouse-cd11c-antibody-7149>  
 CD25/ AF488 / Invitrogen/ <https://www.thermofisher.com/antibody/product/CD25-Antibody-clone-PC61-5-Monoclonal/53-0251-82>  
 CD25/ PE-Cy7 / Invitrogen/ <https://www.thermofisher.com/antibody/product/CD25-Antibody-clone-PC61-5-Monoclonal/25-0251-82>  
 CD28/unconjugated/Biolegend/<https://www.biolegend.com/en-us/products/purified-anti-mouse-cd28-antibody-117>  
 CD45/ BV650 / Biolegend/ <https://www.biolegend.com/en-us/products/brilliant-violet-650-anti-mouse-cd45-antibody-11987>  
 CD45/ AF700 / BD Biosciences/ <https://www.thermofisher.com/antibody/product/CD45-Antibody-clone-30-F11-Monoclonal/56-0451-82>  
 CD45/ BV510 / Biolegend/ <https://www.biolegend.com/en-us/products/brilliant-violet-510-anti-mouse-cd45-antibody-7995>  
 CD64/ FITC / Biolegend/ <https://www.biolegend.com/en-us/products/fitc-anti-mouse-cd64-fcgmari-antibody-12422>  
 CD64/ PE / Biolegend/ <https://www.biolegend.com/en-us/products/pe-anti-mouse-cd64-fcgmari-antibody-6691>  
 CD127/ PE / Biolegend/ <https://www.biolegend.com/en-us/products/pe-anti-mouse-cd127-il-7ralpha-antibody-6190>  
 CD90.2/ BV786 / Biolegend/ <https://www.biolegend.com/en-us/products/brilliant-violet-785-anti-mouse-cd90-2-antibody-9106>  
 CXCR4/ PE / Biolegend/ <https://www.biolegend.com/en-us/products/pe-anti-mouse-cd184-cxcr4-antibody-9057>  
 CXCR4/ Biotin / Biolegend/ <https://www.biolegend.com/en-us/products/biotin-anti-mouse-cd184-cxcr4-antibody-14104>  
 F4/80/ BV786 / Biolegend/ <https://www.biolegend.com/en-us/products/brilliant-violet-785-anti-mouse-f4-80-antibody-9919>  
 F4/80/ APC / eBioscience/ <https://www.thermofisher.com/antibody/product/F4-80-Antibody-clone-BM8-Monoclonal/17-4801-82>  
 FoxP3/ BV421 / Invitrogen/ <https://www.thermofisher.com/antibody/product/FOXP3-Antibody-clone-FJK-16s-Monoclonal/48-5773-82>  
 FoxP3/ FITC / Invitrogen/ <https://www.thermofisher.com/antibody/product/FOXP3-Antibody-clone-FJK-16s-Monoclonal/11-5773-82>  
 GITR/ APC / Biolegend/ <https://www.biolegend.com/en-us/products/apc-anti-mouse-cd357-gitr-antibody-4646>  
 IFNgamma/unconjugated/BioLegend/<https://www.biolegend.com/en-us/products/ultra-leaf-purified-anti-mouse-ifn-gamma-antibody-7752>  
 Ki67/ PE / Invitrogen/ <https://www.thermofisher.com/antibody/product/Ki-67-Antibody-clone-SolA15-Monoclonal/12-5698-82>  
 Ly6C/ AF700 / BD Bioscience/ <https://www.bdbiosciences.com/us/reagents/research/antibodies-buffers/immunology-reagents/anti-mouse-antibodies/cell-surface-antigens/alexa-fluor-700-rat-anti-mouse-ly-6c-al-21/p/561237>  
 Ly6C/ PerCP-Cy5.5 / BD Bioscience/ <https://www.bdbiosciences.com/us/reagents/research/antibodies-buffers/immunology-reagents/anti-mouse-antibodies/cell-surface-antigens/percp-cy55-rat-anti-mouse-ly-6c-al-21/p/560525>  
 Ly6C/ PE-Cy7 / BD Bioscience/ <https://www.bdbiosciences.com/eu/reagents/research/antibodies-buffers/immunology-reagents/anti-mouse-antibodies/cell-surface-antigens/pe-cy7-rat-anti-mouse-ly-6c-al-21/p/560593>  
 Ly6G/ APC-Cy7 / Biolegend/ <https://www.biolegend.com/en-us/products/apc-cy7-anti-mouse-ly-6g-antibody-6755>  
 MHC II / FITC / Biolegend/ <https://www.biolegend.com/en-us/products/fitc-anti-mouse-i-a-i-e-antibody-366>  
 MHC II/ BV650 / BD Bioscience/ <https://www.bdbiosciences.com/us/reagents/research/antibodies-buffers/immunology-reagents/anti-mouse-antibodies/cell-surface-antigens/bv650-rat-anti-mouse-i-ai-e-m5114152-also-known-as-m5114/p/563415>  
 NRP1/ FITC / R&D Systems/ [https://www.rndsystems.com/products/mouse-neuropilin-1-alexa-fluor-488-conjugated-antibody-761705\\_fab5994g](https://www.rndsystems.com/products/mouse-neuropilin-1-alexa-fluor-488-conjugated-antibody-761705_fab5994g)  
 RORγ(t)/ PE / eBioscience/ <https://www.thermofisher.com/antibody/product/ROR-gamma-t-Antibody-clone-B2D-Monoclonal/12-6981-82>  
 TBET/ APC / Invitrogen/ <https://www.thermofisher.com/antibody/product/T-bet-Antibody-clone-eBio4B10-4B10-Monoclonal/17-5825-82>  
 TCRβ/ BV711 / Biolegend/ <https://www.biolegend.com/en-us/products/brilliant-violet-711-anti-mouse-tcr-beta-chain-antibody-13539>  
 IL1β pro-form/ Pe-Cy7 / Miltenyi Biotec/ <https://www.miltenyibiotec.com/CA-en/products/mac-flow-cytometry/antibodies/primary-antibodies/anti-il-1b-pro-form-antibodies-mouse-rea577-1-10.html#pe-vio770:30-ug-in-1-ml>  
 IL10/ BV605 / BD Biosciences/ <https://www.bdbiosciences.com/us/applications/research/t-cell-immunology/th-2-cells/intracellular-markers/cytokines-and-chemokines/mouse/bv605-rat-anti-mouse-il-10-jes5-16e3/p/564082>

## Animals and other organisms

Policy information about [studies involving animals](#); [ARRIVE guidelines](#) recommended for reporting animal research

### Laboratory animals

The following mouse strains were used:  
 DBA/1 males age 9-10 weeks at collagen immunisation  
 DEREK males age 8-15 weeks at collagen immunisation  
 CD4-Bmal/- Per2::luc males, age 8-20 weeks

### Wild animals

The study did not involve wild animals

### Field-collected samples

The study did not involve samples collected in the field

### Ethics oversight

Local ethical approval was provided by the University of Manchester Animal Welfare Ethical Review Board (AWERB)

Note that full information on the approval of the study protocol must also be provided in the manuscript.

## Flow Cytometry

### Plots

Confirm that:

- The axis labels state the marker and fluorochrome used (e.g. CD4-FITC).
- The axis scales are clearly visible. Include numbers along axes only for bottom left plot of group (a 'group' is an analysis of identical markers).
- All plots are contour plots with outliers or pseudocolor plots.
- A numerical value for number of cells or percentage (with statistics) is provided.

### Methodology

Sample preparation

Cells were digested from limbs using collagenase from Clostridium histolyticum with a digestion time of 45 mins at 37°C. Cells were extracted from lymph nodes and spleen using mechanical disruption. Cell staining was carried out in a 96 well V bottomed plate. After live/dead staining (LIVE/DEAD fixable blue dead stain kit, ThermoFisher Scientific) and blocking (1:100 anti mouse CD16/CD32, Fisher Scientific, UK) cells were stained with a panel of antibodies. For intracellular staining an eBioscience FoxP3/Transcription factor staining kit (Thermo Fisher) was utilized as per kit instructions. Where intracellular cytokine expression was analysed, isolated joint cells were first incubated in media containing monensin (1:1000, BioLegend UK) for 3.5h at 37°C before staining commenced. After application of antibodies targeting extracellular proteins, cells were incubated with a fixation/permeabilisation solution (FoxP3/Transcription factor staining kit, Thermo Fisher) for 45min before intracellular staining. Amine Reactive Compensation beads (Thermo Fisher Scientific) were utilized with the LIVE/DEAD stain for compensation controls. One Comp eBeads (Thermo Fisher Scientific) were utilized to produce single stained compensation controls.

Instrument

Cells were analysed on an LSR II or BD Biosciences LSR Fortessa  
Fluorescence assisted cell sorting was undertaken using either a BD Biosciences FACS Aria Fusion or BD Influx (BD Biosciences).

Software

BD FACS Diva was utilised to collect FACS data and data was analysed using Flow Jo.

Cell population abundance

Details of cell population abundance are provided in the manuscript

Gating strategy

Gating strategies are shown in the manuscript. For each experiment cells were first gated on FSC(A) and SSC(A) to exclude debris. FSC(H) and FSC(A) was utilised to identify single cells and subsequently cells were gated for Live/dead to exclude dead cells. Gating strategies are shown in the manuscript and distinct cell populations were gated as follows:

MHC II low macrophages: Single/live/CD45+/CD11b+/Ly6C+/F4/80+/MHCII low

MHC II high macrophages: Single/live/CD45+/CD11b+/Ly6C+/F4/80+/MHCII high

Neutrophils: Single/live/CD45+/CD11b+/Ly6C+/F4/80-/Ly6G+

CD3e T cells: Single/live/CD45+/B220-/CD3e+

CD4+ T cells: Single/live/CD45+/B220-/CD3e+/CD4+

CD8+ T cells: Single/live/CD45+/B220-/CD3e+/CD8+

Th1 cells: Single/live/CD45+/B220-/CD3e+/CD4+/Tbet+

Th17 cells: Single/live/CD45+/B220-/CD3e+/CD4+/RORgammaT+

Treg (using intracellular markers): Single/live/CD45+/B220-/CD3e+/CD4+/CD25+/FoxP3+

Treg (using only extracellular markers): Single/live/CD45+/CD3e+/CD4+/CD25+/CD127-

Ly6C hi monocytes: Single/live/CD45+/CD11b+/Ly6G-/F4/80-/Ly6C hi

Ly6C low monocytes: Single/live/CD45+/CD11b+/Ly6G-/F4/80-/Ly6C low

Dendritic cells: Single/live/CD45+/TCRbeta-/CD11c+/CD11b+/CD64-/CD4-

- Tick this box to confirm that a figure exemplifying the gating strategy is provided in the Supplementary Information.
